# Supplementary material for: Prognostic Value of Holter Monitoring in Light Chain Amyloidosis
Source: MDPI journal article supplement (doi:10.3390/jcm12237457), 2023-12-01
Supplement: s1 [file s1]

# SUPPLEMENTARY MATERIAL

Sun et al. Prognostic value of Holter monitoring in light chain amyloidosis

## Contents:

### I: Supplementary methods

Sample size calculation (P2)

### II: Supplementary references (P3)

### III: Supplementary tables

Table S1: Overall Survival in CA/non-CA Patients(P4)

Table S2: Overall survival of CA Patients based on treatment strategies (n=110) (P4)

### IV: Supplementary figures

Figure S1: Kaplan-Meier survival estimates for OS based on the presence or absence of CA (P5)

Figure S2: Kaplan-Meier survival estimates for OS in CA patients based on their treatment strategies (P5)

17 **I: Supplementary methods**

18 **Sample size calculation**

19 The sample size calculation for the clinical prediction model was based on the estimated  
20 risk of the primary endpoint events in the target population, the number of predictor  
21 variables to be included, and the expected goodness-of-fit of the model measured by Cox-  
22 Snell  $R^2$ [1].

23 The formula used for calculation was:

24 
$$n = P/(S - 1) \ln \left( 1 - \frac{R^2_{cs}}{S} \right)$$

25 Based on previous literature reports [2,3], the incidence rate of overall mortality in the  
26 AL amyloidosis population was approximately 20%. The median follow-up time in this  
27 study was 2 years, with Cox-Snell  $R^2$  set at 0.20. Considering the inclusion of 3 variables,  
28 the calculated required sample size was 120 patients.

29 The sample size calculation for this study was performed using R software version 4.1.2  
30 (R Foundation for Statistical Computing, Vienna, Austria) pmsampsize function [4].

31

32

## II: Supplementary References:

1. Riley, R. D.; Ensor, J.; Snell, K. I. E.; Harrell, F. E.; Jr, Martin, G. P.; Reitsma, J. B.; Moons, K. G. M.; Collins, G.; van Smeden, M. Calculating the Sample Size Required for Developing a Clinical Prediction Model. *BMJ* 2020, 368, m441. <https://doi.org/10.1136/bmj.m441>.
2. Kastritis, E.; Palladini, G.; Minnema, M. C.; Wechalekar, A. D.; Jaccard, A.; Lee, H. C.; Sanchorawala, V.; Gibbs, S.; Mollee, P.; Venner, C. P., et al. Daratumumab-Based Treatment for Immunoglobulin Light-Chain Amyloidosis. *N. Engl. J. Med.* 2021, 385 (1), 46–58. <https://doi.org/10.1056/NEJMoa2028631>.
3. Sidana, S.; Tandon, N.; Brady, P. A.; Grogan, M.; Gertz, M. A.; Dispenzieri, A.; Lin, G.; Dingli, D.; Buadi, F. K.; Lacy, M. Q.; et al. Prognostic Significance of Holter Monitor Findings in Patients with Light Chain Amyloidosis. *Mayo Clin. Proc.* 2019, 94 (3), 455–464. <https://doi.org/10.1016/j.mayocp.2018.08.039>.
4. Ensor, J.; Martin, E. C.; Riley, R. D. Pmsampsize: Calculates the Minimum Sample Size Required for Developing a Multivariable Prediction Model, 2022. <https://cran.r-project.org/web/packages/pmsampsize/index.html> (accessed 2023-10-19).

### III: Supplementary Tables:

**Table S1: Overall Survival in CA/non-CA Patients**

| Variable                  | 0-5 years OS<br>(95% CI) | p value | Median OS<br>(95% CI) | p value |
|---------------------------|--------------------------|---------|-----------------------|---------|
| CA patients<br>(n=110)    | 55.5(49.7-61.3)          | 0.070   | 68.7                  | 0.045   |
| non-CA patients<br>(n=27) | 73.5(63.1-83.9)          |         | NR*                   |         |

Notes: CA: cardiac amyloidosis; OS: overall survival; NR: not reached.

\*: The overall mortality rate did not reach 50% at the end of the follow-up.

**Table S2: Overall survival of CA Patients based on treatment strategies (n=110)**

| Variable                            | 0-5 years OS<br>(95% CI) | p value | Median OS<br>(95% CI) | p value |
|-------------------------------------|--------------------------|---------|-----------------------|---------|
| Daratumumab-based<br>therapy (n=28) | 85.7(79.1-92.3)          | 0.215   | 85.7(79.1-92.3)       | 0.215   |
| Other therapies<br>(n=82)           | 52.6(46.5-58.7)          |         | 42.7(35.5-49.9)       |         |

Note: CA: cardiac amyloidosis; OS: overall survival.

62 IV: Supplementary Figures:

63

64 Figure S1: Kaplan-Meier survival estimates for OS based on the presence or absence of  
65 CA

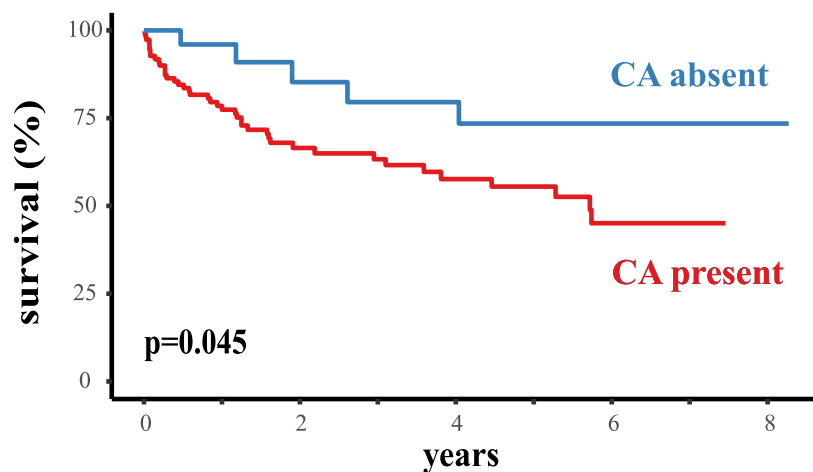

66

67 Note: CA: cardiac amyloidosis; OS: overall survival.

68

69 Figure S2: Kaplan-Meier survival estimates for OS in CA patients based on their  
70 treatment strategies

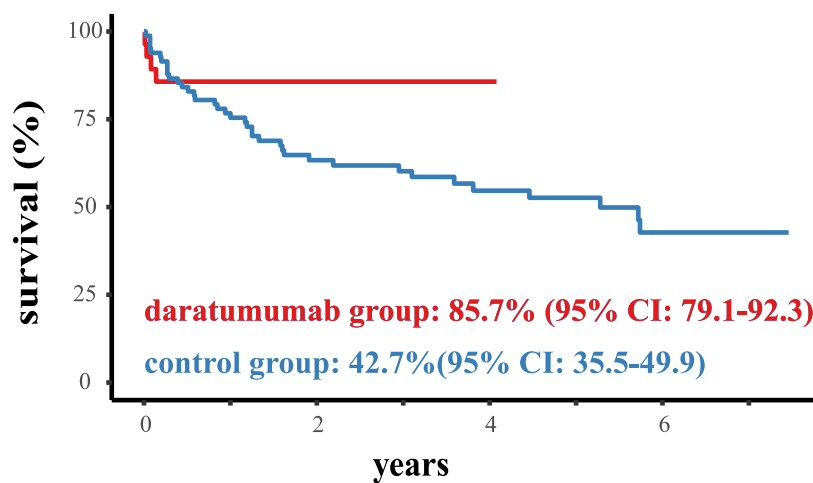

71

72 Note: CA: cardiac amyloidosis; OS: overall survival.
